# Supplementary material for: Doxorubicin-Loaded Polyelectrolyte Multilayer Capsules Modified with Antitumor DR5-Specific TRAIL Variant for Targeted Drug Delivery to Tumor Cells
Source: MDPI journal article supplement (doi:10.3390/nano13050902), 2023-02-27
Supplement: s1 [file s1]

# Doxorubicin-Loaded Polyelectrolyte Multilayer Capsules Modified with Antitumor DR5-Specific TRAIL Variant for Targeted Drug Delivery to Tumor Cells

Anastasia Gileva <sup>1,\*</sup>, Daria Trushina <sup>2,†</sup>, Anne Yagolovich <sup>1,3,†</sup>, Marine Gasparian <sup>1</sup>, Leyli Kurbanova <sup>1</sup>, Ivan Smirnov <sup>1</sup>, Sergey Burov <sup>4</sup> and Elena Markvicheva <sup>1</sup>

<sup>1</sup> Shemyakin-Ovchinnikov Institute of Bioorganic Chemistry RAS, 117997 Moscow, Russia

<sup>2</sup> Laboratory of Bioorganic Structures, Shubnikov Institute of Crystallography of Federal Scientific Research Centre “Crystallography and Photonics” of Russian Academy of Sciences, Moscow 119333, Russia

<sup>3</sup> Faculty of Biology, Lomonosov Moscow State University, 119192 Moscow, Russia

<sup>4</sup> Cytomed JSC, Orlovo-Denisovsky pr. 14, St. 197375 Petersburg, Russia,

\* Correspondence: sumina.anastasia@mail.ru; Tel.: +79164517818

† These authors contributed equally to this work

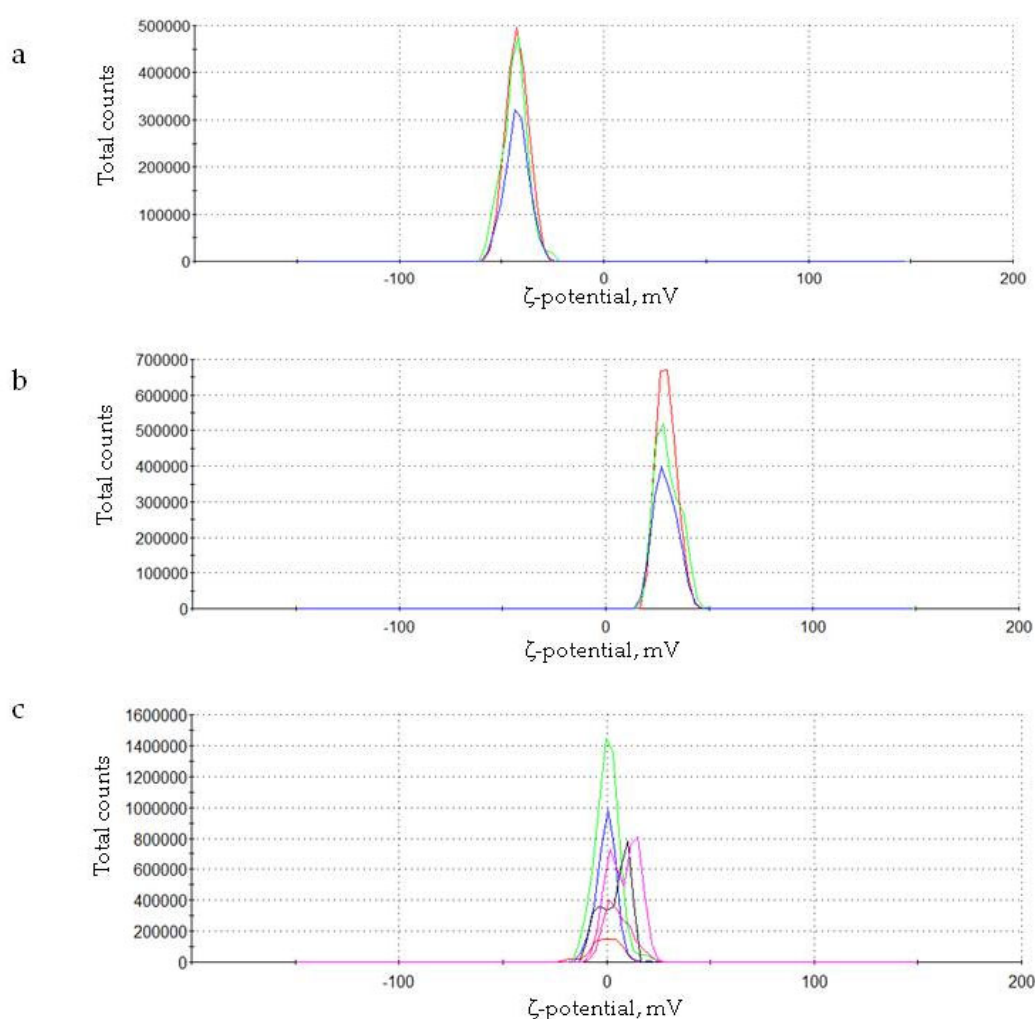

**Figure S1.** ζ-potential distributions for intact (Parg/DS)<sub>3</sub> capsules (a), (Parg/DS)<sub>3</sub> capsules after modification with targeted protein DR5-B (b), and for DR5-B protein molecules (c).

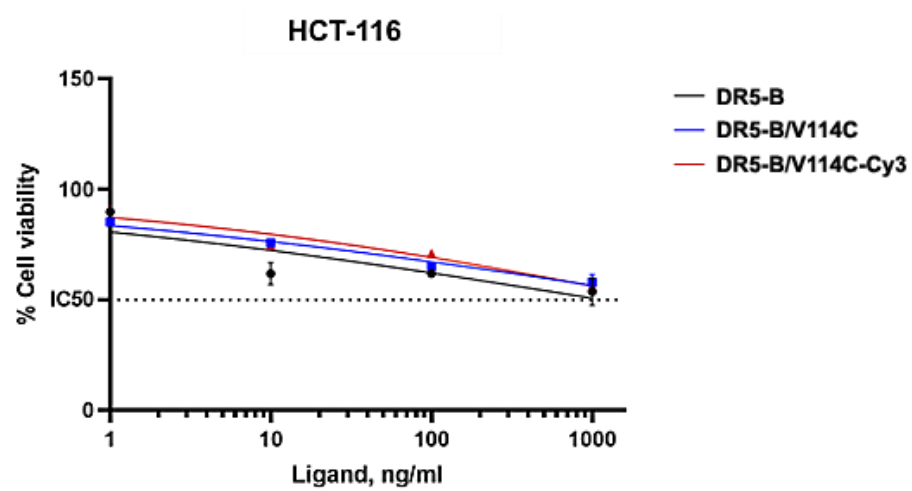

**Figure S2.** Cytotoxicity of free DR5-B, DR5-B/V114C and DR5-B/V114C-Cy3 for colorectal carcinoma HCT-116 monolayer cell culture. MTT-test.
